# Supplementary material
Source: PubMed Central journal article supplement (PMC4925239)
Supplement: NIHMS782533-supplement-2.pdf [file NIHMS782533-supplement-2.pdf]

Corresponding Author: Young-Goo Han

Manuscript Number: NN-A53823A

Manuscript Type: Article

# Main Figures: 7

# Supplementary Figures: 10

# Supplementary Tables: 0

# Supplementary Videos: 0

## Reporting Checklist for Nature Neuroscience

This checklist is used to ensure good reporting standards and to improve the reproducibility of published results. For more information, please read [Reporting Life Sciences Research](#).

Please note that in the event of publication, it is mandatory that authors include all relevant methodological and statistical information in the manuscript.

### ► Statistics reporting, by figure

- Please specify the following information for each panel reporting quantitative data, and where each item is reported (section, e.g. Results, & paragraph number).
- Each figure legend should ideally contain an exact sample size (n) for each experimental group/condition, where n is an exact number and not a range, a clear definition of how n is defined (for example x cells from x slices from x animals from x litters, collected over x days), a description of the statistical test used, the results of the tests, any descriptive statistics and clearly defined error bars if applicable.
- For any experiments using custom statistics, please indicate the test used and stats obtained for each experiment.
- Each figure legend should include a statement of how many times the experiment shown was replicated in the lab; the details of sample collection should be sufficiently clear so that the replicability of the experiment is obvious to the reader.
- For experiments reported in the text but not in the figures, please use the paragraph number instead of the figure number.

**Note:** Mean and standard deviation are not appropriate on small samples, and plotting independent data points is usually more informative. When technical replicates are reported, error and significance measures reflect the experimental variability and not the variability of the biological process; it is misleading not to state this clearly.

|                            |                 | TEST USED             |              | n                                  |                       |                             | DESCRIPTIVE STATS (AVERAGE, VARIANCE) |             | P VALUE               |                 | DEGREES OF FREEDOM & F/t/z/R/ETC VALUE |  |
|----------------------------|-----------------|-----------------------|--------------|------------------------------------|-----------------------|-----------------------------|---------------------------------------|-------------|-----------------------|-----------------|----------------------------------------|--|
| FIGURE NUMBER              | WHICH TEST?     | SECTION & PARAGRAPH # | EXACT VALUE  | DEFINED?                           | SECTION & PARAGRAPH # | REPORTED?                   | SECTION & PARAGRAPH #                 | EXACT VALUE | SECTION & PARAGRAPH # | VALUE           | SECTION & PARAGRAPH #                  |  |
| example<br>1a              | one-way ANOVA   | Fig. legend           | 9, 9, 10, 15 | mice from at least 3 litters/group | Methods para 8        | error bars are mean +/- SEM | Fig. legend                           | p = 0.044   | Fig. legend           | F(3, 36) = 2.97 | Fig. legend                            |  |
| example<br>results, para 6 | unpaired t-test | Results para 6        | 15           | slices from 10 mice                | Results para 6        | error bars are mean +/- SEM | Results para 6                        | p = 0.0006  | Results para 6        | t(28) = 2.808   | Results para 6                         |  |
| +<br>-                     |                 |                       |              |                                    |                       |                             |                                       |             |                       |                 |                                        |  |

| TEST USED     |                                                                                              | n                     |                 |                                                | DESCRIPTIVE STATS (AVERAGE, VARIANCE) |                               | P VALUE               |                                                                                                                                                                                            | DEGREES OF FREEDOM & F/t/z/R/ETC VALUE |                                                                                                                                                         |                       |
|---------------|----------------------------------------------------------------------------------------------|-----------------------|-----------------|------------------------------------------------|---------------------------------------|-------------------------------|-----------------------|--------------------------------------------------------------------------------------------------------------------------------------------------------------------------------------------|----------------------------------------|---------------------------------------------------------------------------------------------------------------------------------------------------------|-----------------------|
| FIGURE NUMBER | WHICH TEST?                                                                                  | SECTION & PARAGRAPH # | EXACT VALUE     | DEFINED?                                       | SECTION & PARAGRAPH #                 | REPORTED?                     | SECTION & PARAGRAPH # | EXACT VALUE                                                                                                                                                                                | SECTION & PARAGRAPH #                  | VALUE                                                                                                                                                   | SECTION & PARAGRAPH # |
| 1d            | Unpaired t-test (Assumed to be normal distribution, but not formally tested, equal variance) | Fig. legend           | 3,3             | brains of 3 pairs of mutant and control mice   | Fig. legend                           | error bars are mean +/- STDEV | Fig. legend           | P = 0.0380<br>F test for variance<br>P = 0.3510                                                                                                                                            | Fig. legend                            | t(4) = 3.050<br>F(2, 2) = 4.697                                                                                                                         | Fig. legend           |
| 1e            | Unpaired t test (Normal distribution by KS test, equal variance)                             | Fig. legend           | 9, 9; 9, 9; 9,9 | slices from 3 pairs of mutant and control mice | Fig. legend                           | error bars are mean +/- STDEV | Fig. legend           | P = 0.0006 (Satb2);<br>P = 0.3634 (Ctip2);<br>P = 0.0250 (Tbr1)<br>F test for variance<br>P = 4.255 (Satb2)<br>P = 0.8609 (Ctip2)<br>P = 0.2070 (Tbr1)<br>KS test for normality<br>P > 0.1 | Fig. legend                            | t(10) = 4.877 (Satb2)<br>t(10) = 0.9522 (Ctip2)<br>t(10) = 2.635 (Tbr1)<br>F(5, 5) = 0.1380 (Satb2)<br>F(5, 5) = 1.179 (Ctip2)<br>F(5,5) = 3.385 (Tbr1) | Fig. legend           |
| 2             | Mann Whitney test                                                                            | Results para 3        | 8, 8            | slices from 3 pairs of mutant and control mice | Results para 3                        | Standard error                | Results para 3        | P = 0.0379                                                                                                                                                                                 | Results paragraph 3                    | Sum of ranks = 88, 48;<br>Mann-Whitney U = 12.00                                                                                                        | Results para 3        |
| 2b aRG        | Unpaired t test (Normal distribution, equal variance)                                        | Fig. legend           | 8, 8; 8, 8      | Slices from 3 pairs of mutant and control mice | Fig. legend                           | error bars are mean +/- SEM   | Fig. legend           | P = 0.7888 (aRG_M);<br>P = 0.2648 (aRG_D)<br>F test for variance<br>P = 0.6628 (aRG_M);<br>P = 0.1556 (aRG_D)<br>KS test for normality<br>P > 0.1                                          | Fig. legend                            | t(14) = 0.2730 (aRG_M);<br>t(14) = 1.162 (aRG_D)<br>F(7, 7) = 1.408 (aRG_M);<br>F(7, 7) = 3.127 (aRG_D)                                                 | Fig. legend           |

|        |                     |                                                                                 |             |                            |                                                |             |                             |             |                                                                                                                                                                                             |             |                                                                                                                                                |             |
|--------|---------------------|---------------------------------------------------------------------------------|-------------|----------------------------|------------------------------------------------|-------------|-----------------------------|-------------|---------------------------------------------------------------------------------------------------------------------------------------------------------------------------------------------|-------------|------------------------------------------------------------------------------------------------------------------------------------------------|-------------|
| +<br>- | 2b<br>bRG           | Unpaired t test with Welch's correction (Normal distribution, unequal variance) | Fig. legend | 8, 8; 8, 8                 | Slices from 3 pairs of mutant and control mice | Fig. legend | error bars are mean +/- SEM | Fig. legend | P = 0.0003 (bRG_M);<br>P < 0.0001 (bRG_D)<br><br>F test for variance<br>P = 0.0003 (bRG_M);<br>P = 0.0369 (bRG_D)<br><br>KS test for normality<br>P > 0.1                                   | Fig. legend | t(7)=6.503 (bRG_M);<br>t(9)=8.780 (bRG_D)<br><br>F(7, 7) = 28.04 (bRG_M);<br>F(7, 7) = 5.603 (bRG_D)                                           | Fig. legend |
| +<br>- | 2c<br>(IPC-total)   | Unpaired t test (Normal distribution, equal variance)                           | Fig. legend | 8, 8; 8, 8                 | Slices from 3 pairs of mutant and control mice | Fig. legend | error bars are mean +/- SEM | Fig. legend | P = 0.0017 (IPC_M);<br>P = 0.0458 (IPC_D)<br><br>F test for variance<br>P = 0.2378 (IPC_M);<br>P = 0.6396 (IPC_D)<br><br>KS test for normality<br>P > 0.1                                   | Fig. legend | t(13)=3.926 (IPC_M);<br>t(13)=2.208 (IPC_D)<br><br>F(6, 7) = 2.596 (IPC_M);<br>F(6, 7) = 1.441 (IPC_D)                                         | Fig. legend |
| +<br>- | 2c<br>(SVZ)         | Unpaired t test (Normal distribution, equal variance)                           | Fig. legend | 8, 8; 8, 8                 | Slices from 3 pairs of mutant and control mice | Fig. legend | error bars are mean +/- SEM | Fig. legend | P < 0.0001 (SVZ IPC_M);<br>P < 0.0001 (SVZ IPC_D)<br><br>F test for variance<br>P = 0.7069 (SVZ IPC_M);<br>P = 0.1388 (SVZ IPC_D)<br><br>KS test for normality<br>P > 0.1                   | Fig. legend | t(13)=11.92 (SVZ IPC_M);<br>t(13)=11.52 (SVZ IPC_D)<br><br>F(6, 7) = 1.336 (SVZ IPC_M);<br>F(6, 7) = 3.350 (SVZ IPC_D)                         | Fig. legend |
| +<br>- | 2f                  | Unpaired t test with Welch's correction                                         | Fig. legend | 7 (smoM2),<br>5 (control)  | Slices from 3 pairs of mutant and control mice | Fig. legend | error bars are mean +/- SEM | Fig. legend | P = 0.0051<br><br>F test for variance<br>P = 0.0059<br><br>KS test for normality<br>P > 0.1                                                                                                 | Fig. legend | t(6) = 4.300<br><br>F(6, 4) = 3.350                                                                                                            | Fig. legend |
| +<br>- | 3b<br>proliferation | Unpaired t test (Normal distribution, equal variance)                           | Fig. legend | all 8, 8 control and SmoM2 | Slices from 3 pairs of mutant and control mice | Fig. legend | error bars are mean +/- SEM | Fig. legend | P = 0.2680 (aRG);<br>P = 0.0103 (bRG);<br>P = 0.0001 (IPC)<br><br>F test for variance<br>P = 0.5533 (aRG);<br>P = 0.3659 (bRG);<br>P = 0.1751 (IPC)<br><br>KS test for normality<br>P > 0.1 | Fig. legend | t(14)=1.154 (aRG);<br>t(14)=2.960 (bRG);<br>t(14)=15.75 (IPC)<br><br>F(7, 7) = 1.594 (aRG);<br>F(7, 7) = 2.045 (bRG);<br>F(7, 7) = 2.963 (IPC) | Fig. legend |

|        |                                       |                                                                                                                                                              |                |                                     |                                                                                                                                                                     |                |                             |             |                                                                                                                                                   |                |                                                                                                                             |                |
|--------|---------------------------------------|--------------------------------------------------------------------------------------------------------------------------------------------------------------|----------------|-------------------------------------|---------------------------------------------------------------------------------------------------------------------------------------------------------------------|----------------|-----------------------------|-------------|---------------------------------------------------------------------------------------------------------------------------------------------------|----------------|-----------------------------------------------------------------------------------------------------------------------------|----------------|
| +<br>- | 3b<br>bRG,<br>IPC<br>self-<br>renewal | Unpaired t test with Welch's correction for bRG (Normal distribution, unequal variance)<br><br>Unpaired t test for IPC (Normal distribution, equal variance) | Fig. legend    | 8, 8                                | Slices from 3 pairs of mutant and control mice                                                                                                                      | Fig. legend    | error bars are mean +/- SEM | Fig. legend | P = 0.0056 (bRG);<br>P = 0.0001 (IPC)<br><br>F test for variance<br>P = 0.0274 (bRG);<br>P = 0.0869 (IPC)<br><br>KS test for normality<br>P > 0.1 | Fig. legend    | t(9) = 3.618 (bRG);<br>t(14) = 5.321 (IPC)<br><br>F(7, 7) = 6.245 (bRG);<br>F(7, 7) = 4.013 (IPC)                           | Fig. legend    |
| +<br>- | 3c                                    | Mann Whitney test                                                                                                                                            | Fig. legend    | 40 (Control),<br>114 (SmoM2)        | Number of EdU +oRG cells from 3 pairs of mice                                                                                                                       | Fig. legend    | N/A                         | Fig. legend | P = 0.0001                                                                                                                                        | Fig. legend    | Sum of ranks = 1392 , 10540;<br>Mann-Whitney U = 571.5                                                                      | Fig. legend    |
| +<br>- | 3e                                    | Mann Whitney test                                                                                                                                            | Fig. legend    | 10, 8 (Neuron);<br>7, 7 (IPC vs RG) | Slices from 3 pairs of mutant and control mice                                                                                                                      | Fig. legend    | error bars are mean +/- SEM | Fig. legend | P = 0.0006 (Neuron);<br>P = 0.0021 (IPC vs RG)                                                                                                    | Fig. legend    | Sum of ranks = 134 , 37<br>Mann-Whitney U = 1.000 (Neuron);<br>Sum of ranks = 28 , 77<br>Mann-Whitney U = 0.000 (IPC vs RG) | Fig. legend    |
| +<br>- | 3g                                    | Mann Whitney test                                                                                                                                            | Fig. legend    | 71 control ,<br>100 SmoM2           | Mitotic figures of least 15 sections from 3 pairs of mutant and control mice                                                                                        | Fig. legend    | N/A                         | Fig. legend | P = 0.0092                                                                                                                                        | Fig. legend    | Sum of ranks = 6937 and 7769;<br>Mann-Whitney U = 2719                                                                      | Fig. legend    |
| +<br>- | 4                                     | Mann Whitney test                                                                                                                                            | Results para 7 | 61 Control,<br>101 SMOM2            | 40 out of 61 control clones<br>72 out of 101 SMOM2 clones that contain IPC                                                                                          | Results para 7 | N/A                         | N/A         | P = 0.0158                                                                                                                                        | Results para 7 | Sum of ranks = 4390 and 1938;<br>Mann-Whitney U = 1118                                                                      | Results para 7 |
| +<br>- | 4c                                    | Chi-square test/Fisher's exact test                                                                                                                          | Fig. legend    | 50, 61;<br>66, 101                  | 50 (GFP) and 61 (SmoM2-GFP) clones (48 hours) from 4 and 3 embryos respectively; 66 (GFP) and 101 (SmoM2-GFP) clones (72 hours) from 6 and 12 embryos, respectively | Fig. legend    | N/A                         | Fig. legend | Fisher's exact test<br>P = 0.0823<br>Chi-square test<br>P = 0.1659 (E15);<br>Chi-square test<br>P = 0.0002 (E16)                                  | Fig. legend    | Chi-square (2) = 3.593 (E15);<br>Chi-square (2) = 17.61 (E16)                                                               | Fig. legend    |

|        |    |                                                                                                                                                                                                                      |                |                                                    |                                                                                                             |                |                                  |                |                                                                                                                                                                                                                                     |                |                                                                                                                                                                                                                                                                                            |                |
|--------|----|----------------------------------------------------------------------------------------------------------------------------------------------------------------------------------------------------------------------|----------------|----------------------------------------------------|-------------------------------------------------------------------------------------------------------------|----------------|----------------------------------|----------------|-------------------------------------------------------------------------------------------------------------------------------------------------------------------------------------------------------------------------------------|----------------|--------------------------------------------------------------------------------------------------------------------------------------------------------------------------------------------------------------------------------------------------------------------------------------------|----------------|
| +<br>- | 5b | Mann<br>Whitney test                                                                                                                                                                                                 | Fig.<br>legend | 9, 9; 9,9;<br>9, 9                                 | Slices from 3 pairs<br>of mutant and<br>control mice                                                        | Fig.<br>legend | error bars are<br>mean +/- SEM   | Fig.<br>legend | P = 0.5076<br>(aRG_M);<br>P = 0.3401<br>(aRG_D);<br>P = 0.0005<br>(bRG_M);<br>P = 0.0002<br>(bRG_D)                                                                                                                                 | Fig.<br>legend | Sum of ranks =<br>93.50 , 77.50<br>Mann-Whitney<br>U = 32.50<br>(aRG_M);<br>Sum of ranks =<br>97 , 74<br>Mann-Whitney<br>U = 29.00<br>(aRG_D);<br>Sum of ranks =<br>122 , 49<br>Mann-Whitney<br>U = 4.000<br>(bRG_M);<br>Sum of ranks<br>=124 , 47<br>Mann-Whitney<br>U = 2.000<br>(bRG_D) | Fig.<br>legend |
| +<br>- | 5c | Mann<br>Whitney test                                                                                                                                                                                                 | Fig.<br>legend | 9, 9; 9, 9                                         | Slices from 3 pairs<br>of mutant and<br>control mice                                                        | Fig.<br>legend | error bars are<br>mean +/- SEM   | Fig.<br>legend | P = 0.0188<br>(IPC_M);<br>P = 0.0078<br>(IPC_D)                                                                                                                                                                                     | Fig.<br>legend | Sum of ranks =<br>112 , 59<br>Mann-Whitney<br>U = 14.00<br>(IPC_M);<br>Sum of ranks =<br>115 , 56<br>Mann-Whitney<br>U = 11.00<br>(IPC_D)                                                                                                                                                  | Fig.<br>legend |
| +<br>- | 5d | Unpaired t<br>test with<br>Welch's<br>correction<br>(Normal<br>distribution,<br>unequal<br>variance)                                                                                                                 | Fig.<br>legend | 7, 7                                               | 190 (control)<br>144 (Mut) mitotic<br>spindles of<br>7 slices from 3<br>pairs of mutant<br>and control mice | Fig.<br>legend | error bars are<br>mean +/- SEM   | Fig.<br>legend | P = 0.0124<br><br>KS test for<br>normality<br>P > 0.1<br><br>F test for<br>variance<br>P = 0.0098                                                                                                                                   | Fig.<br>legend | t(7) = 3.343<br><br>F(6, 6) = 11.18                                                                                                                                                                                                                                                        | Fig.<br>legend |
| +<br>- | 5e | Unpaired t<br>test (Normal<br>distribution,<br>equal<br>variance for<br>Tbr1, ctip2)<br>and<br>Unpaired t<br>test with<br>Welch's<br>correction<br>(Normal<br>distribution,<br>unequal<br>variance for<br>for Satb2) | Fig.<br>legend | 9,9;9,9;<br>9,9                                    | Slices from 3 pairs<br>of mutant and<br>control mice                                                        | Fig.<br>legend | error bars are<br>mean +/- STDEV | Fig.<br>legend | P < 0.0001<br>(Tbr1);<br>P = 0.0271<br>(Ctip2);<br>P < 0.0001<br>(Satb2)<br><br>KS test for<br>normality<br>P > 0.1<br><br>F test for<br>equal variance<br>P = 0.4990<br>(Tbr1);<br>P = 0.0701<br>(Ctip2);<br>P < 0.0418<br>(Satb2) | Fig.<br>legend | t(16)=5.244<br>(Tbr1);<br>t(16)=2.432<br>(Ctip2);<br>t(11)=7.947<br>(Satb2)<br><br>F (8,8) = 1.642<br>(Tbr1);<br>F (8,8) = 3.928<br>(Ctip2);<br>F (8,8) = 4.719<br>(Satb2)                                                                                                                 | Fig.<br>legend |
| +<br>- | 7a | Wilcoxon<br>rank sum<br>test (Mann<br>Whitney<br>test)                                                                                                                                                               | Fig.<br>legend | 123<br>(DMSO),<br>135<br>(SANT-1),<br>133<br>(SAG) | Mitotic figures<br>from 15 organoids<br>from 3<br>independent<br>experiments                                | Fig.<br>legend | N/A                              | Fig.<br>legend | P = 0.0007<br>(DMSO vs.<br>SANT-1);<br>P = 0.2681<br>(DMSO vs.<br>SAG)                                                                                                                                                              | Fig.<br>legend | Sum of ranks =<br>14080 , 19590,<br>Mann-Whitney<br>U = 6330<br>(DMSO<br>vs.SANT-1);<br>Sum of ranks =<br>15336 , 17817<br>Mann-Whitney<br>U = 7586<br>(DMSO vs. SAG)                                                                                                                      | Fig.<br>legend |

|        |      |                                                                                 |                |                                                    |                                                                                                                   |                |                                |                |                                                                                               |                |                                                               |                |
|--------|------|---------------------------------------------------------------------------------|----------------|----------------------------------------------------|-------------------------------------------------------------------------------------------------------------------|----------------|--------------------------------|----------------|-----------------------------------------------------------------------------------------------|----------------|---------------------------------------------------------------|----------------|
| +<br>- | 7b   | Mann<br>Whitney test                                                            | Fig.<br>legend | 21<br>(DMSO),<br>21<br>(SANT-1)                    | Mini 'cortices' of<br>11 (DMSO),<br>15 (SANT-1)<br>cerebral organoids<br>from 3<br>independent<br>experiments     | Fig.<br>legend | error bars are<br>mean +/- SEM | Fig.<br>legend | P < 0.0001<br>(DMSO vs.<br>SANT-1)                                                            | Fig.<br>legend | Sum of ranks =<br>627.5 , 275.5,<br>Mann-Whitney<br>U = 44.50 | Fig.<br>legend |
| +<br>- | 7b   | Mann<br>Whitney test                                                            | Fig.<br>legend | 21<br>(DMSO),<br>20<br>(SAG)                       | Mini 'cortices' of<br>11 (DMSO),<br>13 (SAG) cerebral<br>organoids from 3<br>independent<br>experiments           | Fig.<br>legend | error bars are<br>mean +/- SEM | Fig.<br>legend | P = 0.2565<br>(DMSO vs.<br>SAG)                                                               | Fig.<br>legend | Sum of ranks =<br>485 , 376,<br>Mann-Whitney<br>U = 166.0     | Fig.<br>legend |
| +<br>- | 7c   | Fisher's<br>exact test                                                          | Fig.<br>legend | 294<br>(DMSO),<br>292<br>(SANT-1),<br>400<br>(SAG) | Total number of<br>cilia of each group                                                                            | Fig.<br>legend | N/A                            | Fig.<br>legend | P < 0.0001<br>(DMSO vs.<br>SANT-1);<br>P = 0.6454<br>(DMSO vs.<br>SAG)                        | Fig.<br>legend | N/A                                                           | Fig.<br>legend |
| +<br>- | 7c   | Descriptive:<br>(percent of<br>cilia<br>containing<br>Smo in each<br>organoids) | Fig.<br>legend | 4<br>(DMSO),<br>3<br>(SANT-1),<br>3<br>(SAG)       | Number of<br>organoids of each<br>group                                                                           | Fig.<br>legend | error bars are<br>mean +/- SD  | Fig.<br>legend | N/A                                                                                           | Fig.<br>legend | N/A                                                           | Fig.<br>legend |
| +<br>- | S3d  | Mann<br>Whitney test                                                            | Fig.<br>legend | 9, 9                                               | Slices from 4 pairs<br>of mutant and<br>control mice                                                              | Fig.<br>legend | error bars are<br>mean +/- SEM | Fig.<br>legend | P = 0.0004<br>(PH3+ Tbr2+)                                                                    | Fig.<br>legend | Sum of ranks =<br>45, 126,<br>Mann-Whitney<br>U = 0.0000      | Fig.<br>legend |
| +<br>- | S3d  | Mann<br>Whitney test                                                            | Fig.<br>legend | 9, 9                                               | Slices from 4 pairs<br>of mutant and<br>control mice                                                              | Fig.<br>legend | error bars are<br>mean +/- SEM | Fig.<br>legend | P = 0.2878<br>(AP PH3+Sox2<br>+Tbr2-)                                                         | Fig.<br>legend | Sum of ranks =<br>98, 73,<br>Mann-Whitney<br>U = 28.00        | Fig.<br>legend |
| +<br>- | S3d  | Mann<br>Whitney test                                                            | Fig.<br>legend | 9, 9                                               | Slices from 4 pairs<br>of mutant and<br>control mice                                                              | Fig.<br>legend | error bars are<br>mean +/- SEM | Fig.<br>legend | P = 0.0016<br>(nonAP PH3<br>+Sox2+Tbr2-)                                                      | Fig.<br>legend | Sum of ranks =<br>50, 121,<br>Mann-Whitney<br>U = 5.000       | Fig.<br>legend |
| +<br>- | S10b | Unpaired t<br>test<br><br>(Normal<br>distribution,<br>equal<br>variance)        | Fig.<br>legend | 10<br>(DMSO);<br>12<br>(SANT-1)                    | 10 (DMSO) and 12<br>(SANT-1) 'cortical'<br>regions of 4<br>organoids each<br>from 2<br>independent<br>experiments | Fig.<br>legend | N/A                            | Fig.<br>legend | P < 0.0001<br><br>KS normality<br>test<br>P > 0.1<br><br>F test for<br>variance<br>P = 0.5469 | Fig.<br>legend | t(20) = 5.126<br>F(9, 11) = 1.458                             | Fig.<br>legend |
| +<br>- |      |                                                                                 |                |                                                    |                                                                                                                   |                |                                |                |                                                                                               |                |                                                               |                |

## ► Representative figures

- Are any representative images shown (including Western blots and immunohistochemistry/staining) in the paper?

If so, what figure(s)?

All the immunostainings micrographs

- For each representative image, is there a clear statement of how many times this experiment was successfully repeated and a discussion of any limitations in repeatability?

If so, where is this reported (section, paragraph #)?

Figure legends

## ► Statistics and general methods

1. Is there a justification of the sample size?
 

If so, how was it justified?

Where (section, paragraph #)?

Even if no sample size calculation was performed, authors should report why the sample size is adequate to measure their effect size.

No statistical methods were used to pre-determine sample sizes but our sizes are similar to those reported in previous publications

We analyzed at least three different mice from different breeding pairs. The mutant phenotypes were strong enough to show significant differences from comparing three control and three mutant mice.
  
2. Are statistical tests justified as appropriate for every figure?
 

Where (section, paragraph #)?

  - a. If there is a section summarizing the statistical methods in the methods, is the statistical test for each experiment clearly defined?
 

Figure legends, methods statistics, paragraph 19
  
  - b. Do the data meet the assumptions of the specific statistical test you chose (e.g. normality for a parametric test)?
 

Where is this described (section, paragraph #)?

Statistical methods were summarized in the 'Statistics' section in Methods (paragraph 19). Statistical test for each experiment was defined in the figure legend or in the text.
  
  - c. Is there any estimate of variance within each group of data?
 

Is the variance similar between groups that are being statistically compared?

Where is this described (section, paragraph #)?

All the parametric analyses were formally tested for normal distribution and equal variance, except for the data in Figure 1d, of which we only had 3 pair of MRI samples and the n is too small for normality test.

'Statistics' section in Methods (paragraph 19)
  
  - d. Are tests specified as one- or two-sided?
 

Figure legends
  
  - e. Are there adjustments for multiple comparisons?
 

'Statistics' section in Methods (paragraph 19) All are two-sided
  
  - f. Are there adjustments for multiple comparisons?
 

N/A
  
3. Are criteria for excluding data points reported?
 

Was this criterion established prior to data collection?

Where is this described (section, paragraph #)?

We have not excluded any data or animals
  
4. Define the method of randomization used to assign subjects (or samples) to the experimental groups and to collect and process data.
 

If no randomization was used, state so.

Where does this appear (section, paragraph #)?

No randomization was done (Statistics subsection in Methods).

5. Is a statement of the extent to which investigator knew the group allocation during the experiment and in assessing outcome included?  
If no blinding was done, state so.  
Where (section, paragraph #)?
- No blinding was done for in vivo experiments; it was impossible because mutant phenotype was too obvious.  
For in vitro study, blinding was done (Legends for Figure 2 and 4).
6. For experiments in live vertebrates, is a statement of compliance with ethical guidelines/regulations included?  
Where (section, paragraph #)?
- Methods, paragraph 1
7. Is the species of the animals used reported?  
Where (section, paragraph #)?
- Methods, paragraph 1
8. Is the strain of the animals (including background strains of KO/transgenic animals used) reported?  
Where (section, paragraph #)?
- Methods, paragraph 1
9. Is the sex of the animals/subjects used reported?  
Where (section, paragraph #)?
- Methods, paragraph 1
10. Is the age of the animals/subjects reported?  
Where (section, paragraph #)?
- Methods, paragraph 1
11. For animals housed in a vivarium, is the light/dark cycle reported?  
Where (section, paragraph #)?
- Methods, paragraph 1
12. For animals housed in a vivarium, is the housing group (i.e. number of animals per cage) reported?  
Where (section, paragraph #)?
- Methods, paragraph 1
13. For behavioral experiments, is the time of day reported (e.g. light or dark cycle)?  
Where (section, paragraph #)?
- N/A
14. Is the previous history of the animals/subjects (e.g. prior drug administration, surgery, behavioral testing) reported?  
Where (section, paragraph #)?
- N/A
- a. If multiple behavioral tests were conducted in the same group of animals, is this reported?  
Where (section, paragraph #)?
15. If any animals/subjects were excluded from analysis, is this reported?  
Where (section, paragraph #)?
- We haven't excluded any animals



a. How were the criteria for exclusion defined?  
Where is this described (section, paragraph #)?

b. Specify reasons for any discrepancy between the number of animals at the beginning and end of the study.  
Where is this described (section, paragraph #)?

## ► Reagents

1. Have antibodies been validated for use in the system under study (assay and species)?

Yes

a. Is antibody catalog number given?  
Where does this appear (section, paragraph #)?

Methods, paragraph 5

b. Where were the validation data reported (citation, supplementary information, Antibodypedia)?  
Where does this appear (section, paragraph #)?

Company product literature including related citations can be readily found using the catalog number.

Methods, paragraph 5

2. Cell line identity

NO

a. Are any cell lines used in this paper listed in the database of commonly misidentified cell lines maintained by [ICLAC](#) and [NCBI Biosample](#)?  
Where (section, paragraph #)?

b. If yes, include in the Methods section a scientific justification of their use--indicate here in which section and paragraph the justification can be found.

c. For each cell line, include in the Methods section a statement that specifies:  
- the source of the cell lines  
- have the cell lines been authenticated? If so, by which method?  
- have the cell lines been tested for mycoplasma contamination?

Where (section, paragraph #)?

Human cerebral organoids section in Methods

## ▶ Data deposition

Data deposition in a public repository is mandatory for:

- Protein, DNA and RNA sequences
- Macromolecular structures
- Crystallographic data for small molecules
- Microarray data

Deposition is strongly recommended for many other datasets for which structured public repositories exist; more details on our data policy are available [here](#). We encourage the provision of other source data in supplementary information or in unstructured repositories such as [Figshare](#) and [Dryad](#).

We encourage publication of Data Descriptors (see [Scientific Data](#)) to maximize data reuse.

- Are accession codes for deposit dates provided?

Where (section, paragraph #)?

Accession codes section at the end of discussion

## ▶ Computer code/software

Any custom algorithm/software that is central to the methods must be supplied by the authors in a usable and readable form for readers at the time of publication. However, referees may ask for this information at any time during the review process.

- Identify all custom software or scripts that were required to conduct the study and where in the procedures each was used.

N/A

- If computer code was used to generate results that are central to the paper's conclusions, include a statement in the Methods section under "**Code availability**" to indicate whether and how the code can be accessed. Include version information as necessary and any restrictions on availability.

## ▶ Human subjects

- Which IRB approved the protocol?

Where is this stated (section, paragraph #)?

The St. Jude Children's Research Hospital Institutional Review Board approved the use of fixed human fetal brain samples. It is stated in Human fetal brain samples subsection in Methods.

- Is demographic information on all subjects provided?

Where (section, paragraph #)?

n/a

- Is the number of human subjects, their age and sex clearly defined?

Where (section, paragraph #)?

n/a

- Are the inclusion and exclusion criteria (if any) clearly specified?

Where (section, paragraph #)?

n/a

5. How well were the groups matched?

Where is this information described (section, paragraph #)?

n/a

6. Is a statement included confirming that informed consent was obtained from all subjects?

Where (section, paragraph #)?

n/a

7. For publication of patient photos, is a statement included confirming that consent to publish was obtained?

Where (section, paragraph #)?

n/a

## ► fMRI studies

For papers reporting functional imaging (fMRI) results please ensure that these minimal reporting guidelines are met and that all this information is clearly provided in the methods:

1. Were any subjects scanned but then rejected for the analysis after the data was collected?

a. If yes, is the number rejected and reasons for rejection described?

Where (section, paragraph #)?

2. Is the number of blocks, trials or experimental units per session and/or subjects specified?

Where (section, paragraph #)?

3. Is the length of each trial and interval between trials specified?

4. Is a blocked, event-related, or mixed design being used? If applicable, please specify the block length or how the event-related or mixed design was optimized.

5. Is the task design clearly described?

Where (section, paragraph #)?

6. How was behavioral performance measured?

7. Is an ANOVA or factorial design being used?

8. For data acquisition, is a whole brain scan used?

If not, state area of acquisition.

a. How was this region determined?

9. Is the field strength (in Tesla) of the MRI system stated?
- a. Is the pulse sequence type (gradient/spin echo, EPI/spiral) stated?
- b. Are the field-of-view, matrix size, slice thickness, and TE/TR/flip angle clearly stated?
10. Are the software and specific parameters (model/functions, smoothing kernel size if applicable, etc.) used for data processing and pre-processing clearly stated?
11. Is the coordinate space for the anatomical/functional imaging data clearly defined as subject/native space or standardized stereotaxic space, e.g., original Talairach, MNI305, ICBM152, etc? Where (section, paragraph #)?
12. If there was data normalization/standardization to a specific space template, are the type of transformation (linear vs. nonlinear) used and image types being transformed clearly described? Where (section, paragraph #)?
13. How were anatomical locations determined, e.g., via an automated labeling algorithm (AAL), standardized coordinate database (Talairach daemon), probabilistic atlases, etc.?
14. Were any additional regressors (behavioral covariates, motion etc) used?
15. Is the contrast construction clearly defined?
16. Is a mixed/random effects or fixed inference used?
- a. If fixed effects inference used, is this justified?
17. Were repeated measures used (multiple measurements per subject)?
- a. If so, are the method to account for within subject correlation and the assumptions made about variance clearly stated?
18. If the threshold used for inference and visualization in figures varies, is this clearly stated?
19. Are statistical inferences corrected for multiple comparisons?
- a. If not, is this labeled as uncorrected?

20. Are the results based on an ROI (region of interest) analysis?

a. If so, is the rationale clearly described?

b. How were the ROI's defined (functional vs anatomical localization)?

21. Is there correction for multiple comparisons within each voxel?

22. For cluster-wise significance, is the cluster-defining threshold and the corrected significance level defined?

## ► Additional comments

---

Additional Comments
